# Supplementary material for: Synthesis of Fe3C@porous carbon nanorodsviacarbonizing Fe complexes for oxygen reduction reaction and Zn–air battery
Source: Royal Society of Chemistry journal article supplement (doi:10.1039/c9qi01544b), 2020-01-01
Supplement: c9qi01544b1.pdf [file c9qi01544b1.pdf]

# Electronic Supporting Information

## Synthesis of Fe<sub>3</sub>C@porous Carbon Nanorods via carbonization for Oxygen Reduction Reaction and Zn-air Battery

Yijie Zhang, Yong Zhao, Muwei Ji, Han-ming Zhang, Minghui Zhang, Hang Zhao,

Mengsi Cheng, Jiali Yu, Huichao Liu, Caizhen Zhu\* and Jian Xu

*China Institute of Low-dimensional Materials Genome Initiative, College of Chemistry  
and Environmental Engineering of Shenzhen University, Shenzhen 518060, China*

Figure S1-S4.

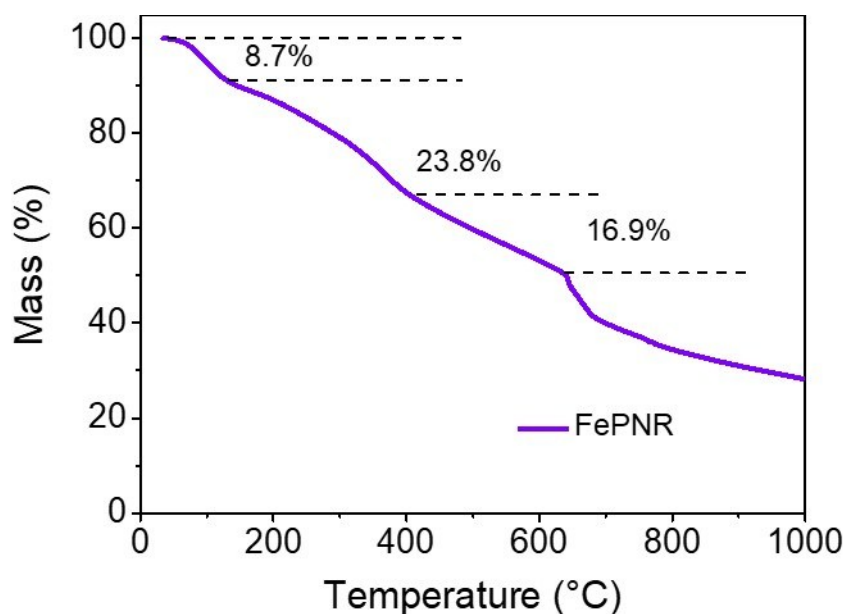

**Figure S1.** TG analysis of the FePNR.

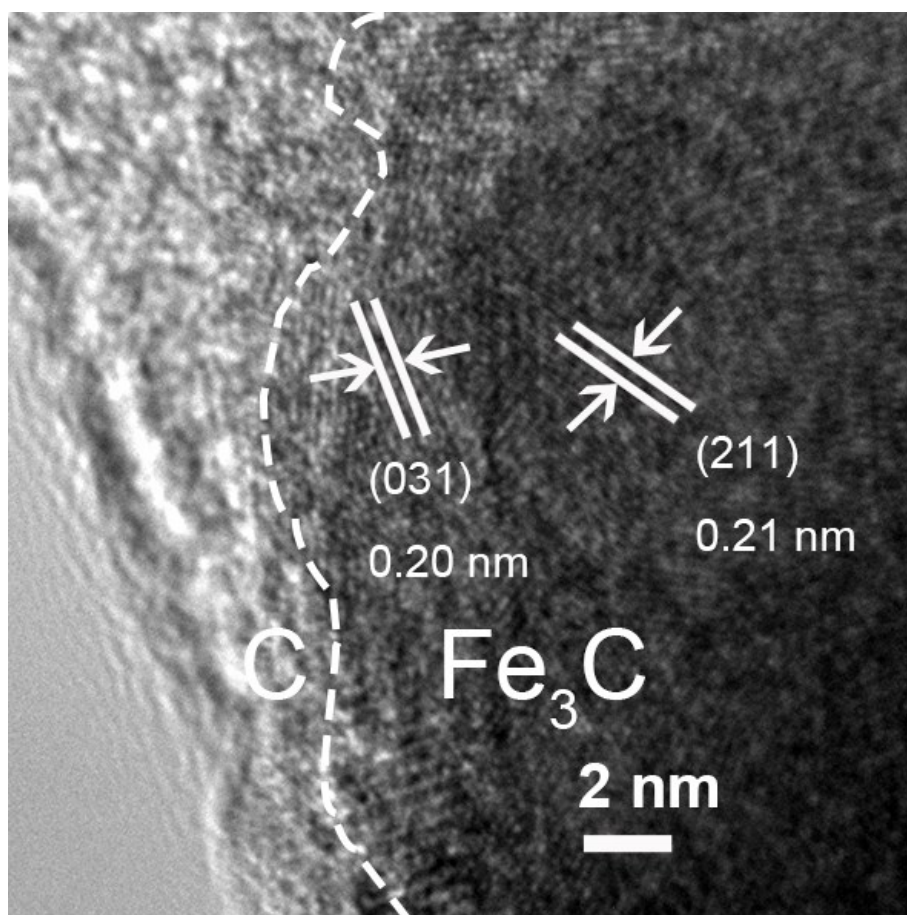

**Figure S2.** The HRTEM image of  $\text{Fe}_3\text{C}/\text{C}$  hetero-structures.

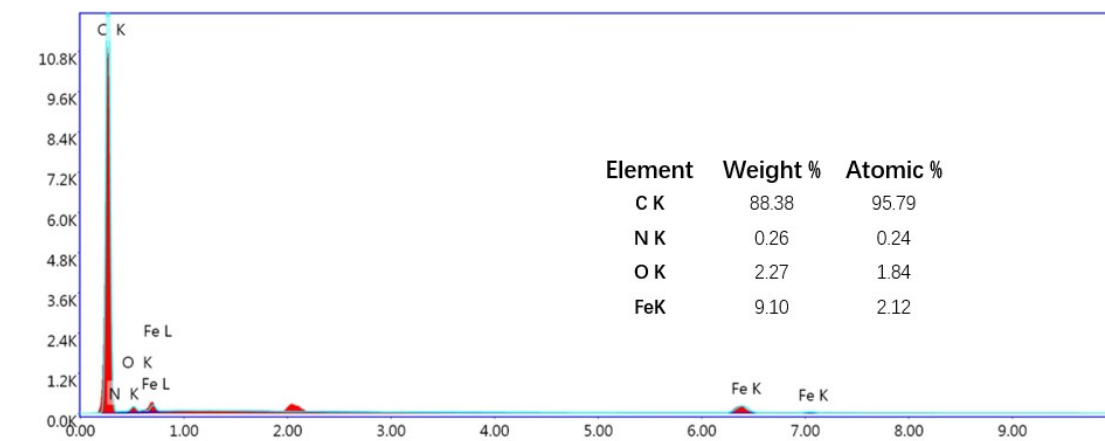

**Figure S3.** The EDX spectra of as-prepared of FeCNR-750

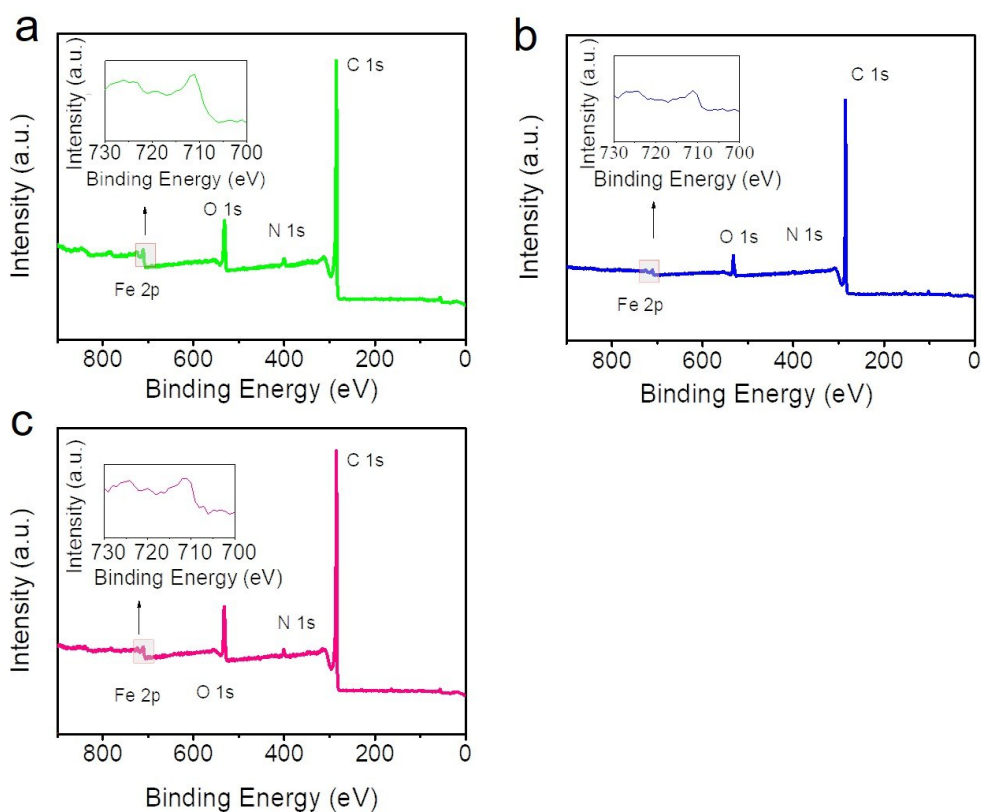

**Figure S4.** XPS survey spectrum of the FeCNR-700, FeCNR-750 and FeCNR-800.

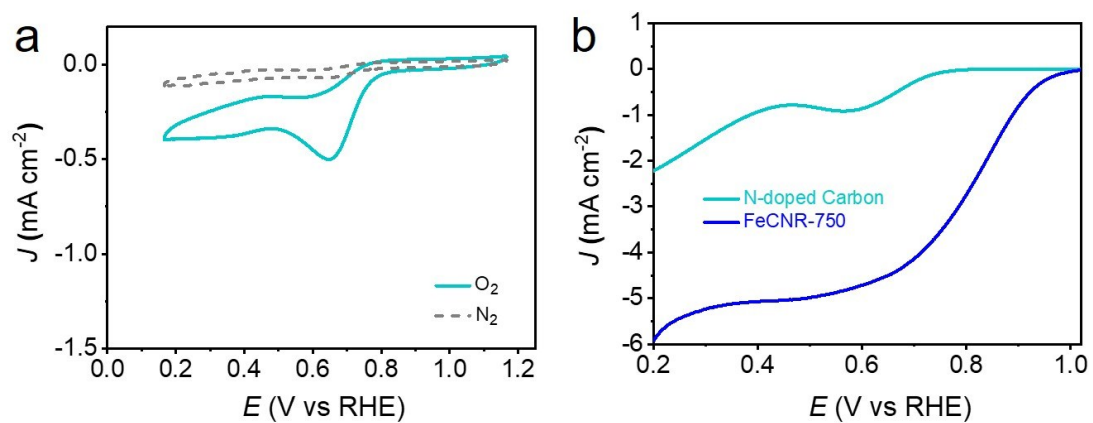

**Figure S5.** (a) The CV plot and (b) LCV curve of as-prepared N-doped carbon prepared by following the method of synthesizing FeCNRs without adding  $\text{Fe}(\text{acac})_3$ .

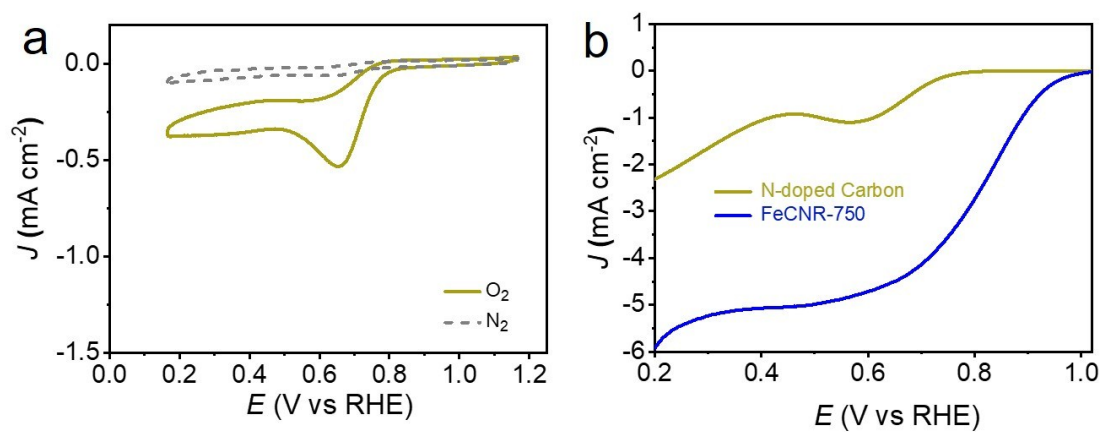

**Figure S6.** (a) The CV plot and (b) LCV curve of as-prepared N-doped carbon prepared by removing the Fe<sub>3</sub>C nanopartilces.

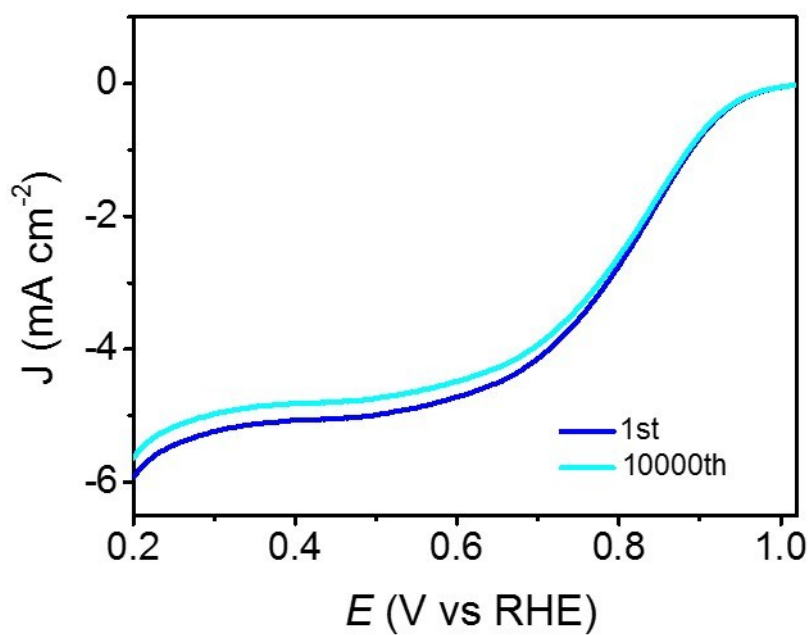

**Figure S7.** LSV curves of FeCNR-750 in 0.1 M KOH at 1600 rpm before and after 10000 cycles.

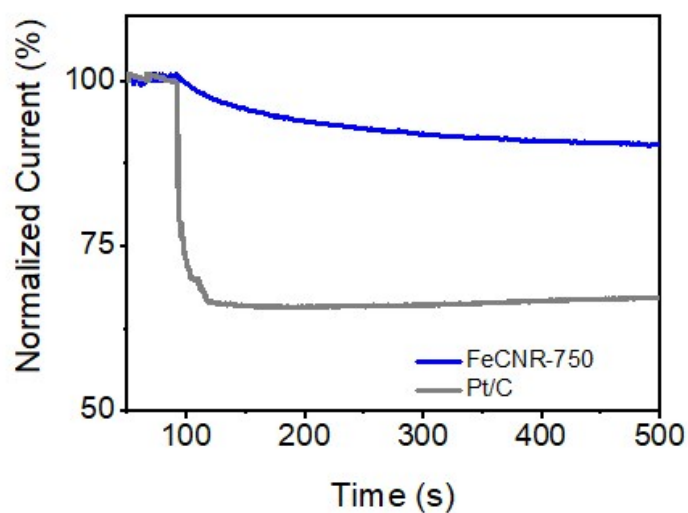

**Figure S8.** The methanol tolerance of FeCNR-750.

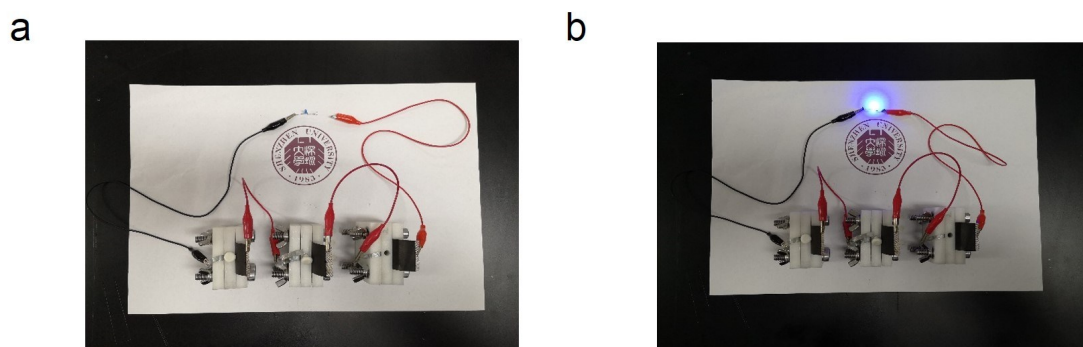

**Figure S9.** There is a photograph of three Zn-air batteries connected in series with FeCNR-750 as the catalysts before (a) and after (b) connecting.

**Table S1.** Comparison of properties of Fe derivatives for Zn-air batteries in alkaline electrolytes

| Catalysts     | Mass Loading<br>$\text{mg cm}^{-2}$ | Specific Capacity<br>$\text{mAh} \cdot \text{g}^{-1}$<br>Zn | Maximum Power Density<br>$\text{mW} \cdot \text{cm}^{-2}$ | Open Circuit Voltage<br>V | Reference    |
|---------------|-------------------------------------|-------------------------------------------------------------|-----------------------------------------------------------|---------------------------|--------------|
| FeCNR-750     | 1                                   | 825.77                                                      | 126.4                                                     | 1.42                      | This work    |
| Fe@C–NG/NCNTs | 1                                   | 682.6                                                       | 101.3                                                     | 1.37                      | <sup>1</sup> |
| FeNC-850      |                                     | 790.0                                                       | 186                                                       | 1.46                      | <sup>2</sup> |

|                                                         |     |       |      |       |    |
|---------------------------------------------------------|-----|-------|------|-------|----|
| Fe–N–CNBs-600                                           |     | 880   | 257  | 1.53  | 3  |
| F <sub>0.2</sub> N <sub>0.2</sub> M <sub>0.2</sub> -900 |     | 637.4 | 95.3 | 1.414 | 4  |
| Fe–Phen–N-800                                           | 0.5 | 708   |      | 1.55  | 5  |
| HP-Fe-N/CNFs                                            |     | 701   | 135  | 1.42  | 6  |
| Fe-N <sub>4</sub> SAs/NPC                               |     |       | 232  |       | 7  |
| Fe-NC-900-M-AW                                          |     |       | 271  | 1.5   | 8  |
| Fe-N-CNFs                                               |     | 614   |      |       | 9  |
| N–P–Fe–C                                                |     | 625   |      | 1.52  | 10 |

## References

1. Q. Wang, Y. Lei, Z. Chen, N. Wu, Y. Wang, B. Wang and Y. Wang, Fe/Fe<sub>3</sub>C@C nanoparticles encapsulated in N-doped graphene–CNTs framework as an efficient bifunctional oxygen electrocatalyst for robust rechargeable Zn–air batteries, *J. Mater. Chem. A*, 2018, **6**, 516-526.
2. J. Yang, J. Hu, M. Weng, R. Tan, L. Tian, J. Yang, J. Amine, J. Zheng, H. Chen and F. Pan, Fe-Cluster Pushing Electrons to N-Doped Graphitic Layers with Fe<sub>3</sub>C(Fe) Hybrid Nanostructure to Enhance O<sub>2</sub> Reduction Catalysis of Zn-Air Batteries, *ACS appl. mater. inter.*, 2017, **9**, 4587-4596.
3. L. Cao, Z.-h. Li, Y. Gu, D.-h. Li, K.-m. Su, D.-j. Yang and B.-w. Cheng, Rational design of N-doped carbon nanobox-supported Fe/Fe<sub>2</sub>N/Fe<sub>3</sub>C nanoparticles as efficient oxygen reduction catalysts for Zn–air batteries, *J. Mater. Chem. A*, 2017, **5**, 11340-11347.
4. W. Yang, Y. Zhang, X. Liu, L. Chen and J. Jia, In situ formed Fe–N doped metal organic framework@carbon nanotubes/graphene hybrids for a rechargeable Zn–air battery, *Chem. Commun.*, 2017, **53**, 12934-12937.
5. Z. K. Yang, Z.-W. Zhao, K. Liang, X. Zhou, C.-C. Shen, Y.-N. Liu, X. Wang and A.-W. Xu, Synthesis of nanoporous structured iron carbide/Fe–N–carbon composites for efficient oxygen reduction reaction in Zn–air batteries, *J. Mater. Chem. A*, 2016, **4**, 19037-19044.
6. Y. Zhao, Q. Lai, Y. Wang, J. Zhu and Y. Liang, Interconnected Hierarchically Porous Fe, N-Codoped Carbon Nanofibers as Efficient Oxygen Reduction Catalysts for Zn–Air Batteries, *ACS appl. mater. inter.*, 2017, **9**, 16178-16186.
7. Y. Pan, S. Liu, K. Sun, X. Chen, B. Wang, K. Wu, X. Cao, W. C. Cheong, R. Shen and A. Han, A Bimetallic Zn/Fe Polyphthalocyanine-Derived Single-Atom Fe-N<sub>4</sub> Catalytic Site: A Superior Trifunctional Catalyst for Overall Water Splitting and Zn–Air Batteries, *Angew. Chem. Int. Ed.*, 2018, **57**, 8614-8618.
8. Z. Liu, J. Liu, H. B. Wu, G. Shen, Z. Le, G. Chen and Y. Lu, Iron-decorated nitrogen-rich carbons as efficient oxygen reduction electrocatalysts for Zn–air

- batteries, *Nanoscale*, 2018, **10**, 16996-17001.
9. Z. Y. Wu, X. X. Xu, B. C. Hu, H. W. Liang, Y. Lin, L. F. Chen and S. H. Yu, Iron Carbide Nanoparticles Encapsulated in Mesoporous Fe-N-Doped Carbon Nanofibers for Efficient Electrocatalysis, *Angew.Chem. Int. Ed.*, 2015, **54**, 8179-8183.
  10. W. Wan, Q. Wang, L. Zhang, H.-W. Liang, P. Chen and S.-H. Yu, N-, P- and Fe-tridoped nanoporous carbon derived from plant biomass: an excellent oxygen reduction electrocatalyst for zinc–air batteries, *J. Mater.Chem. A*, 2016, **4**, 8602-8609.
